# Supplementary material
Source: publisher figshare collection journal article supplement (https://gsapubs.figshare.com/ndownloader/files/40896548)
Supplement: Supplementary file 1 [file 40896548]

## Sheet: This study
Look below for analytical procedure and references
Sample	Spot	Inferred age	1σ	beta 2/3Yb	2σ	beta 7/9Hf	2σ	176Yb/177Hf(corr)	2σ	176Lu/177Hf(corr)	2σ	176Hf/177Hf(corr)	2σ	176Hf/177Hf i	2σ	eHf(t)	2σ	t_dm (Ma)	t_dm2 (Ma)
190-160 Ma zircon (11)
WK-15.3	WK-15.3-09	169.82	4.38	-0.855145	0.06336	-1.08953	0.00715701	0.0882207	0.000425238	0.00274696	1.37728e-05	0.282845	4.76116e-05	0.282991	9.52e-05	11.0715	3.36779	370.159	472.984
	WK-15.3-16	184.097	4.72687	-0.858876	0.0383947	-1.09658	0.00550796	0.0787551	0.000190487	0.00262624	7.03981e-06	0.282537	2.88852e-05	0.282527	5.77704e-05	-5.01742	2.04375	1046.14	1488.9
	WK-15.3-18	176.26	3.6	-0.869753	0.0625453	-1.09545	0.00563799	0.054096	0.000558441	0.00157324	1.3895e-05	0.282319	3.12345e-05	0.282314	6.2469e-05	-12.7354	2.20993	1322.43	1958.38
WK-16	WK-16-02	186.22	3.35	-0.839454	0.0569878	-1.08501	0.00468714	0.0547806	0.000418808	0.0016785	1.4817e-05	0.28236	2.70981e-05	0.282355	5.41962e-05	-11.0857	1.91731	1268.35	1864.64
	WK-16-03	180.245	3.84924	-0.85118	0.0345381	-1.03804	0.00401479	0.0681375	0.00084423	0.00219585	3.75889e-05	0.282905	2.26146e-05	0.282897	4.52292e-05	7.97569	1.60006	503.056	675.924
	WK-16-10	185.241	3.67918	-0.867111	0.0276702	-1.06644	0.00478186	0.0771312	0.00112011	0.00251789	4.6961e-05	0.282906	2.0325e-05	0.282897	4.065e-05	8.09156	1.43808	505.381	672.52
WK-18	WK-18-02	170.249	3.55534	-0.870366	0.039232	-1.03432	0.00406209	0.0419424	0.000569952	0.00107435	8.03909e-06	0.282406	1.73276e-05	0.282402	3.46552e-05	-9.75573	1.22596	1185.53	1770.78
	WK-18-03	161.47	3.31	-0.841069	0.0401552	-1.04446	0.00464944	0.0539881	0.000411908	0.00166018	1.75872e-05	0.282853	1.99289e-05	0.282848	3.98578e-05	5.83414	1.40998	568.805	795.767
	WK-18-16	185.154	3.54437	-0.885221	0.0470164	-1.06135	0.00525992	0.0526336	0.000461491	0.00155927	1.77274e-05	0.282795	2.32697e-05	0.28279	4.65394e-05	4.29565	1.64643	649.769	910.385
	WK-18-20	164.26	3.7	-0.839577	0.0814457	-1.10677	0.00432971	0.0280751	0.000442919	0.000873191	1.33404e-05	0.282321	2.27504e-05	0.282318	4.55008e-05	-12.8674	1.60961	1296.52	1957.43
WK-36	WK-36-11	175.282	3.5989	-0.844174	0.0338248	-1.07473	0.0047954	0.0711961	0.000787723	0.00248717	2.71881e-05	0.282582	2.53061e-05	0.282574	5.06122e-05	-3.57707	1.79047	976.498	1392.98
Sample	Spot	Inferred age	1σ	beta 2/3Yb	2σ	beta 7/9Hf	2σ	176Yb/177Hf(corr)	2σ	176Lu/177Hf(corr)	2σ	176Hf/177Hf(corr)	2σ	176Hf/177Hf i	2σ	eHf(t)	2σ	t_dm (Ma)	t_dm2 (Ma)
150-120 Ma zircon (9)
WK-36	WK-36-21	132.83	4.26	-0.827594	0.0390851	-1.08378	0.0100651	0.0623107	0.00062728	0.00220351	2.19102e-05	0.282878	2.39065e-05	0.282872	4.7813e-05	6.03858	1.69129	542.065	760.804
WK-27.2	WK-27.2-02	139.144	4.49515	-0.862775	0.0393544	-1.05818	0.00468912	0.0675325	0.000925123	0.00204209	2.80782e-05	0.282513	2.69818e-05	0.282508	5.39636e-05	-6.72381	1.90888	1063.54	1560.2
	WK-27.2-16	127.302	2.82571	-0.829549	0.0435306	-1.11685	0.00567356	0.0823622	0.000277832	0.00294692	8.15082e-06	0.282971	3.16509e-05	0.282964	6.33018e-05	9.16225	2.23915	415.073	560.221
	WK-27.2-23	132.036	3.73608	-0.825803	0.0306743	-1.09994	0.00431548	0.0866309	0.000771532	0.00264686	1.82662e-05	0.282614	2.8346e-05	0.282607	5.6692e-05	-3.34866	2.00536	934.156	1345.8
	WK-27.2-26	131.071	2.93634	-0.876185	0.0200495	-1.04793	0.00291284	0.0908144	0.00244534	0.00230677	3.69475e-05	0.282468	2.05839e-05	0.282462	4.11678e-05	-8.51016	1.45622	1136.01	1664.35
	WK-27.2-32	133.863	2.94848	-0.860139	0.0419289	-1.11787	0.00490256	0.0752035	0.000224424	0.00231043	7.02233e-06	0.282427	2.97366e-05	0.282421	5.94732e-05	-9.88619	2.10375	1194.31	1751.26
	WK-27.2-35	138.616	3.02546	-0.832113	0.0557825	-1.10058	0.00568096	0.0599086	0.000450181	0.00197577	1.37233e-05	0.282357	3.0759e-05	0.282352	6.1518e-05	-12.2533	2.1761	1283.89	1900.41
	WK-27.2-11	141.892	2.91985	-0.900086	0.0280937	-1.03403	0.00332009	0.0618875	0.000614499	0.00174455	8.64488e-06	0.28299	1.99985e-05	0.282986	3.9997e-05	10.248	1.41484	374.208	503.161
	WK-27.2-28	142.106	2.98773	-0.861677	0.0298218	-1.06202	0.00497004	0.074934	0.00146787	0.00237787	5.03839e-05	0.282322	2.19209e-05	0.282316	4.38418e-05	-13.4474	1.55085	1347.75	1976.31
Sample	Spot	Inferred age	1σ	beta 2/3Yb	2σ	beta 7/9Hf	2σ	176Yb/177Hf(corr)	2σ	176Lu/177Hf(corr)	2σ	176Hf/177Hf(corr)	2σ	176Hf/177Hf i	2σ	eHf(t)	2σ	t_dm (Ma)	t_dm2 (Ma)
250-200 Ma zircon (16)
WK-15.3	WK-15.3-01	243.5	6.37	-0.819798	0.0421761	-1.07453	0.00563624	0.0905577	0.00120964	0.00264995	3.53424e-05	0.282487	3.24002e-05	0.282475	6.48004e-05	-5.53746	2.29275	1118.05	1566.3
	WK-15.3-08	232.29	4.5597	-0.887258	0.0533399	-1.10132	0.00439892	0.0525868	0.000464758	0.00150707	1.64218e-05	0.28197	2.80939e-05	0.281964	5.61878e-05	-23.8834	1.98797	1806.89	2679.44
	WK-15.3-19	237.983	4.54792	-0.837101	0.0898589	-1.10522	0.00626739	0.0438977	0.000421719	0.00139637	9.8236e-06	0.282363	3.42131e-05	0.282357	6.84262e-05	-9.85741	2.42101	1255.37	1828.32
WK-16	WK-16-08	247.765	4.0414	-0.848578	0.0308978	-1.04308	0.00432964	0.0810162	0.00142974	0.00245052	5.12465e-05	0.282827	2.38872e-05	0.282816	4.77744e-05	6.59702	1.69036	619.663	814.726
	WK-16-13	203.53	4.2	-0.849027	0.0645981	-1.07938	0.00524816	0.03748	0.000481859	0.000953149	1.73703e-05	0.282011	2.43323e-05	0.282007	4.86646e-05	-23.002	1.72168	1726	2604.67
	WK-16-27	246.168	4.75384	-0.887968	0.0500061	-1.11837	0.00538593	0.0805199	0.000311989	0.00244279	9.76868e-06	0.2819	3.42879e-05	0.281889	6.85758e-05	-26.2293	2.42634	1952.58	2831.47
	WK-16-28	234.399	4.52836	-0.805807	0.0375094	-1.0773	0.00465186	0.0651606	0.000847857	0.00190639	2.45784e-05	0.282131	2.56757e-05	0.282123	5.13514e-05	-18.222	1.81686	1600.44	2337.38
	WK-16-33	236.512	4.63726	-0.837604	0.0332115	-1.03571	0.00453245	0.0801278	0.000477826	0.00239615	2.37652e-05	0.282855	2.43368e-05	0.282845	4.86736e-05	7.37324	1.72213	577.6	757.356
	WK-16-34	247.933	4.58508	-0.762919	0.0931092	-1.07921	0.00813741	0.0773536	0.000188821	0.00239426	5.76712e-06	0.282094	5.89882e-05	0.282083	0.000117976	-19.3114	4.17425	1673.72	2413.79
WK-18	WK-18-01	239.88	5.56	-0.85879	0.0478372	-1.02409	0.00401645	0.049475	0.000191052	0.00146839	9.86201e-06	0.282868	2.05315e-05	0.282861	4.1063e-05	8.03077	1.45287	545.646	718.716
	WK-18-07	245.122	4.58359	-0.896385	0.0273042	-1.08079	0.00504421	0.0915875	0.000572137	0.00256135	1.62021e-05	0.282584	2.35912e-05	0.282573	4.71824e-05	-2.06277	1.6694	974.957	1352.47
	WK-18-10	230.81	4.27	-0.850378	0.0646221	-1.04132	0.00383598	0.0229555	0.000212514	0.000699318	9.76566e-06	0.282381	1.81453e-05	0.282378	3.62906e-05	-9.26917	1.28399	1208.01	1786.71
	WK-18-14	231.01	3.92	-0.888484	0.0382241	-1.04469	0.0032293	0.0346167	0.000288885	0.000918782	1.20074e-05	0.282332	1.56169e-05	0.282328	3.12338e-05	-11.0141	1.10507	1281.91	1894.1
	WK-18-21	218.83	4.57	-0.830044	0.0624019	-1.03589	0.00324086	0.0187494	0.000128589	0.000465875	5.03385e-06	0.282324	1.37142e-05	0.282322	2.74284e-05	-11.5142	0.97041	1278.59	1915.6
	WK-18-25	218.95	4.75	-0.861536	0.0395974	-1.05979	0.00433965	0.047595	0.000637898	0.00141787	2.08657e-05	0.281993	1.98881e-05	0.281987	3.97762e-05	-23.3742	1.40727	1772.11	2638.69
WK-36	WK-36-16	220.242	4.65741	-0.869603	0.0411928	-1.01956	0.00718224	0.0343049	0.000351042	0.00108625	1.71919e-05	0.28206	1.6418e-05	0.282055	3.2836e-05	-20.9255	1.16173	1664.53	2491.18
Sample	Spot	Inferred age	1σ	beta 2/3Yb	2σ	beta 7/9Hf	2σ	176Yb/177Hf(corr)	2σ	176Lu/177Hf(corr)	2σ	176Hf/177Hf(corr)	2σ	176Hf/177Hf i	2σ	eHf(t)	2σ	t_dm (Ma)	t_dm2 (Ma)
>250 Ma (26)
WK-16	WK-16-30	253.97	4.26	-0.811585	0.0434631	-1.08436	0.00546858	0.0839726	0.000901781	0.00256059	2.8347e-05	0.282545	3.06341e-05	0.282533	6.12682e-05	-3.26094	2.16782	1031.53	1433.49
	WK-16-01	389.81	6.96	-0.822329	0.032471	-1.05059	0.00483238	0.0759737	0.0006936	0.00248929	2.43513e-05	0.283033	2.24176e-05	0.283015	4.48352e-05	16.8156	1.58686	319.342	282.262
	WK-16-29	1858.95	38.89	-0.826938	0.0363944	-1.02776	0.00330044	0.035675	0.000102842	0.000943847	2.90869e-06	0.282017	1.44303e-05	0.281983	2.88606e-05	13.6646	1.02489	1717.41	1633.64
	WK-16-12	2257.1	29.785	-0.751171	0.08719	-1.10937	0.00427247	0.0298873	0.000356848	0.000843321	6.33076e-06	0.281659	2.50481e-05	0.281622	5.00962e-05	10.0726	1.78064	2199.99	2165.99
	WK-16-22	2318.21	23.15	-0.87305	0.135235	-1.04232	0.00359513	0.00847913	0.000173111	0.000222686	3.64012e-06	0.281425	1.64691e-05	0.281415	3.29382e-05	4.13477	1.17093	2475.79	2573.39
WK-18	WK-18-27	256.139	5.18782	-0.809784	0.0611085	-1.0994	0.00550382	0.0482366	0.000298124	0.00153494	1.1195e-05	0.282695	2.61145e-05	0.282688	5.2229e-05	2.26379	1.848	791.443	1091.94
	WK-18-28	260.94	5.15	-0.887241	0.0488656	-1.09357	0.00538576	0.0571082	0.000561403	0.00163609	1.83172e-05	0.282179	2.51224e-05	0.282171	5.02448e-05	-15.9107	1.77782	1521.41	2216.39
	WK-18-23	1861.42	40.895	-0.902121	0.0467151	-1.07352	0.00504501	0.0569426	0.00149114	0.001514	4.02202e-05	0.281629	2.67975e-05	0.281575	5.3595e-05	-0.766382	1.90325	2279.75	2515.35
	WK-18-24	1881.17	35.3375	-0.944006	0.0588409	-1.04289	0.00365915	0.0264381	0.000922211	0.000874297	2.31431e-05	0.281602	1.83697e-05	0.28157	3.67394e-05	-0.483793	1.30474	2278.86	2513.51
	WK-18-05	1902.16	37.195	-0.879412	0.060813	-1.07268	0.00476716	0.025562	0.000971459	0.000767	3.2825e-05	0.281556	1.95375e-05	0.281528	3.9075e-05	-1.50372	1.38775	2334.46	2591.33
	WK-18-18	1917.59	32.5625	-0.884769	0.0601772	-1.11312	0.00501743	0.0353565	0.000455301	0.00102267	1.48189e-05	0.281489	2.34789e-05	0.281452	4.69578e-05	-3.85404	1.66777	2440.3	2744.91
	WK-18-22	1991.05	38.115	-0.860149	0.0357488	-1.0957	0.00490515	0.0707689	0.00103264	0.00191885	2.96175e-05	0.281593	2.45133e-05	0.281521	4.90266e-05	0.289123	1.74154	2353.53	2551.72
	WK-18-31	1001.4	18.6	-0.844962	0.0652813	-1.1122	0.00692215	0.0640787	0.000222547	0.00174405	4.67124e-06	0.282358	4.26707e-05	0.282325	8.53414e-05	6.16109	3.02467	1274.55	1426.08
WK-27.2	WK-27.2-34	256.636	5.19067	-0.879612	0.0220312	-1.04346	0.00320376	0.085322	0.00134335	0.00195557	2.57947e-05	0.282743	1.81173e-05	0.282733	3.62346e-05	3.87997	1.28208	732.487	991.511
	WK-27.2-14	264.914	5.49084	-0.868602	0.0287217	-1.02667	0.00349263	0.061719	0.000282318	0.00178402	8.61154e-06	0.282981	1.94828e-05	0.282973	3.89656e-05	12.5295	1.37874	387.322	455.174
	WK-27.2-20	277.679	6.66676	-0.84613	0.0376335	-1.06994	0.00402279	0.0580905	0.000790807	0.00172713	2.88515e-05	0.282569	2.21744e-05	0.28256	4.43488e-05	-1.77648	1.56926	974.781	1359.64
	WK-27.2-21	302.127	6.50973	-0.83715	0.0311618	-1.11095	0.00473305	0.0994428	0.00125531	0.00299953	8.90771e-06	0.282558	3.17218e-05	0.282541	6.34436e-05	-1.92098	2.24504	1026	1387.31
	WK-27.2-04	428.441	8.35015	-0.910769	0.0291754	-1.0478	0.00425754	0.097107	0.000753218	0.0033003	3.71214e-05	0.282972	2.50752e-05	0.282946	5.01504e-05	15.2481	1.77514	417.147	411.594
	WK-27.2-10	437.875	9.40622	-0.830759	0.0327974	-1.07138	0.00403453	0.0701062	0.00226405	0.00213041	5.93963e-05	0.282372	2.39424e-05	0.282354	4.78848e-05	-5.48996	1.69498	1267.95	1711.5
	WK-27.2-07	484.369	9.70486	-0.863584	0.0234295	-1.02326	0.00386688	0.0740371	0.000987382	0.0019723	1.6506e-05	0.282349	1.87009e-05	0.282331	3.74018e-05	-5.25868	1.32405	1294.43	1732.71
	WK-27.2-36	1556.9	17	-0.865788	0.041479	-1.05187	0.00327972	0.0377036	9.42632e-05	0.00105135	1.10757e-06	0.282097	1.82568e-05	0.282066	3.65136e-05	9.63972	1.29576	1611.99	1644.25
	WK-27.2-01	378.4	12.5	-0.829353	0.0631563	-1.07399	0.00533218	0.0565825	0.000239777	0.00187212	6.43517e-06	0.282601	3.53424e-05	0.282587	7.06848e-05	1.43468	2.5017	933.741	1237.62
WK-36	WK-36-06	265.72	6.99	-0.767949	0.042981	-1.08186	0.00445962	0.0335793	0.000502466	0.00114295	1.73275e-05	0.282563	1.98595e-05	0.282558	3.9719e-05	-2.12672	1.4054	967.69	1372.2
	WK-36-12	407.043	7.94551	-0.846458	0.0443322	-1.10186	0.00574983	0.0649033	0.000958104	0.00216582	3.17756e-05	0.282607	2.64935e-05	0.28259	5.2987e-05	2.18629	1.87546	931.994	1212.95
	WK-36-18	590.8	13.1	-0.840857	0.0317752	-1.03866	0.00892539	0.0439936	0.000485241	0.00136483	1.95172e-05	0.282272	1.79224e-05	0.282257	3.58448e-05	-5.48762	1.26924	1380.66	1827.98
	WK-36-09	1358.55	41.0234	-0.829053	0.0447463	-1.05682	0.0032817	0.0426104	0.00120535	0.0014036	4.48187e-05	0.281542	2.82143e-05	0.281506	5.64286e-05	-14.7356	2.00157	2391.43	2972.67
	WK-18-20

## Sheet: Wang et al.
Analytical spot	Apparent age (Ma)	1σ	176Yb/177Hf	2σ	176Lu/177Hf	176Hf/177Hf	2σ
18JV-52-1-02	1883	26	0.008763	7.1e-05	0.000246	0.281541	2.5e-05
18JV-52-1-03	237	3	0.037959	0.000394	0.000946	0.282311	2.6e-05
18JV-52-1-04	1842	26	0.041239	0.000469	0.000998	0.281538	3e-05
18JV-52-1-05	1888	29	0.038232	0.000242	0.000967	0.281563	2.5e-05
18JV-52-1-06	1847	28	0.043502	0.000237	0.00111	0.281484	2.6e-05
18JV-52-1-07	1850	26	0.011391	0.000463	0.000268	0.281502	2.3e-05
18JV-52-1-08	1844	26	0.020226	0.000736	0.000509	0.281542	2.4e-05
18JV-52-1-09	242	3	0.020058	6.6e-05	0.000643	0.282504	2.3e-05
18JV-52-1-10	2504	25	0.024507	0.000188	0.000676	0.281355	2.8e-05
18JV-52-1-11	155	3	0.046884	0.000304	0.001444	0.282917	2.8e-05
18JV-52-1-13	215	4	0.031115	0.000172	0.000798	0.282676	3.2e-05
18JV-52-1-14	247	4	0.022528	7.7e-05	0.000717	0.282978	2.6e-05
18JV-52-1-15	1841	26	0.012836	5e-05	0.00032	0.281474	2.6e-05
18JV-52-1-16	240	4	0.015199	0.00014	0.000501	0.282991	2.7e-05
18JV-52-1-17	234	3	0.018737	0.000209	0.000492	0.282347	2.4e-05
18JV-52-1-18	2346	25	0.038128	0.000317	0.000978	0.281323	2.9e-05
18JV-52-1-19	1855	29	0.032486	0.000376	0.000754	0.281513	2.5e-05
18JV-52-1-20	153	3	0.057064	0.000224	0.001548	0.282925	3e-05
18JV-52-1-21	187	3	0.073719	0.000661	0.00216	0.283041	2.7e-05
18JV-52-1-22	185	3	0.055146	0.00043	0.001539	0.282927	3.1e-05
18JV-52-1-23	2606	27	0.024222	0.000505	0.000604	0.280855	3e-05
18JV-52-1-24	1864	27	0.041032	0.000265	0.001016	0.281518	2.7e-05
18JV-52-1-25	1863	28	0.038559	0.001165	0.000835	0.28153	2.4e-05
18JV-52-1-26	1847	28	0.024995	9.2e-05	0.000605	0.281517	2.6e-05
18JV-52-1-27	160	4	0.072299	0.000736	0.002014	0.28291	2.9e-05
18JV-52-1-28	248	3	0.033391	0.000522	0.00083	0.282246	2.9e-05
18JV-52-1-29	1844	29	0.014389	0.000215	0.000337	0.281502	2.6e-05
18JV-52-1-33	2482	26	0.056961	0.000473	0.001384	0.281185	2.5e-05
18JV-52-1-34	178	3	0.05975	0.000412	0.001791	0.282784	2.7e-05
18JV-52-1-35	178	3	0.096221	0.000837	0.002269	0.282929	3.2e-05
18JV-52-1-36	1859	30	0.040387	0.000313	0.000934	0.28157	2.6e-05
18JV-52-1-37	187	3	0.046388	0.00035	0.00118	0.28289	3.3e-05
18JV-52-1-38	184	3	0.096225	0.00052	0.002209	0.282872	3.2e-05
18JV-52-1-39	238	3	0.021554	0.000201	0.000489	0.282392	2.4e-05
18JV-52-1-40	1830	30	0.035624	0.000485	0.000764	0.281616	2.7e-05
18JV-52-1-41	1867	31	0.016921	0.000569	0.000362	0.281525	2.8e-05
18JV-52-1-42	154	3	0.065509	0.0006	0.001708	0.282811	3e-05
18JV-52-1-43	161	3	0.040325	0.00011	0.001173	0.282893	3.6e-05
18JV-52-1-44	1818	35	0.058944	0.00015	0.001303	0.281602	3e-05
18JV-52-1-45	1876	31	0.017771	0.000371	0.000356	0.281509	3.4e-05
18JV-52-1-46	1865	32	0.055974	0.000351	0.001194	0.281527	3e-05
18JV-52-1-48	160	3	0.035826	0.000718	0.001036	0.283057	3.8e-05
18JV-52-1-49	219	4	0.038261	0.000299	0.000985	0.282875	4.1e-05
18JV-52-1-50	178	3	0.042836	0.000606	0.001137	0.282926	3.5e-05
18JV-56-1-6	179	3	0.054585	0.000597	0.001744	0.282964	3.1e-05
18JV-56-1-7	170	3	0.048055	0.00024	0.001425	0.282898	2.8e-05
18JV-56-1-8	216	3	0.046429	0.000393	0.001428	0.282745	3.1e-05
18JV-56-1-9	190	3	0.098419	0.001977	0.003223	0.282968	3.7e-05
18JV-56-1-10	254	5	0.054207	0.00068	0.001632	0.282976	3.4e-05
18JV-56-1-16	166	2	0.034232	0.000482	0.000966	0.282772	2.8e-05
18JV-56-1-17	162	3	0.090354	0.001066	0.002577	0.282867	3.5e-05
18JV-56-1-18	158	2	0.0509	0.000905	0.001626	0.283041	3e-05
18JV-56-1-19	1909	26	0.044212	0.000282	0.001233	0.282886	2.9e-05
18JV-56-1-20	154	3	0.072354	0.000467	0.00199	0.282858	3.1e-05
18JV-56-1-22	256	3	0.057637	0.000295	0.001567	0.28278	2.8e-05
18JV-56-1-23	157	2	0.032922	0.000382	0.001088	0.282871	3.6e-05
18JV-56-1-24	179	3	0.070231	0.001658	0.002086	0.282853	3.4e-05
18JV-56-1-27	187	2	0.035308	0.000362	0.001012	0.282984	3.2e-05
18JV-56-1-28	195	3	0.058847	0.000848	0.001869	0.282513	5.2e-05
18JV-56-1-29	205	3	0.085215	0.000735	0.002387	0.282964	3.6e-05
18JV-56-1-30	206	3	0.081126	0.001191	0.002498	0.282885	4.3e-05
18JV-56-1-32	163	5	0.049565	0.000318	0.001302	0.282709	3.3e-05
18JV-56-1-33	233	4	0.085012	0.001145	0.002606	0.282913	3.5e-05
18JV-56-1-34	156	2	0.048538	0.000538	0.001419	0.282772	2.9e-05
18JV-56-1-37	171	3	0.040849	0.000313	0.001193	0.282825	3.3e-05
18JV-56-1-38	173	3	0.068494	0.000424	0.002112	0.282795	3.3e-05
18JV-56-1-40	186	4	0.050419	0.000482	0.001383	0.282886	3.8e-05
18JV-56-1-41	163	3	0.085418	0.000805	0.002303	0.282812	4.1e-05
18JV-56-1-42	158	3	0.12019	0.002528	0.002982	0.282879	3.8e-05
18JV-56-1-43	199	3	0.085929	0.000806	0.002998	0.283023	8.5e-05
18JV-56-1-44	174	3	0.074677	0.000706	0.002317	0.282814	3.3e-05
18JV-56-1-45	161	3	0.059027	0.000981	0.001781	0.282688	3.2e-05
18JV-56-1-48	167	4	0.096735	0.00147	0.00264	0.28285	4.5e-05
18JV-56-1-49	279	6	0.048147	0.000659	0.00154	0.282856	3.9e-05
18JV-56-1-50	176	3	0.064531	0.000497	0.0016	0.283017	3.5e-05
18JV73E-5	865	13	0.049023	0.000268	0.001504	0.282596	2.8e-05
18JV-73E-10	146	3	0.071634	0.000448	0.002433	0.282829	0.000104	1e-4 error!
18JV-73E-11	137	2	0.104507	0.001165	0.003458	0.282732	0.000218	1e-4 error!
18JV-93-1-01	2125	26	0.017054	7.8e-05	0.000492	0.281205	2.2e-05
18JV-93-1-02	441	6	0.032426	0.000201	0.001045	0.282222	2.7e-05
18JV-93-1-03	1036	33	0.026682	0.000683	0.000762	0.282329	3.2e-05
18JV-93-1-04	622	8	0.073181	0.000269	0.001972	0.28255	2.9e-05
18JV-93-1-05	1855	27	0.041982	0.000473	0.001165	0.281528	2.4e-05
18JV-93-1-06	1859	27	0.032063	0.000326	0.000934	0.281624	2.8e-05
18JV-93-1-07	1851	29	0.034537	0.000437	0.000898	0.281592	2.5e-05
18JV-93-1-08	231	3	0.060033	0.001052	0.001754	0.283011	3.1e-05
18JV-93-1-09	1040	31	0.020949	0.000893	0.000641	0.282267	2.4e-05
18JV-93-1-10	807	10	0.022152	0.000194	0.000685	0.282059	4.1e-05
18JV-93-1-11	1792	29	0.037997	0.000187	0.000965	0.281635	3.1e-05
18JV-93-1-12	280	4	0.023155	6.5e-05	0.000627	0.282626	2.9e-05
18JV-93-1-14	1830	29	0.061884	0.000374	0.001652	0.281755	2.7e-05
18JV-93-1-15	431	6	0.035658	0.000635	0.00101	0.28223	3.3e-05
18JV-93-1-16	1891	30	0.028038	0.001932	0.000769	0.281738	2.8e-05
18JV-93-1-17	2488	29	0.045249	0.000188	0.001305	0.281353	2.6e-05
18JV-93-1-18	2568	28	0.028266	0.000382	0.000752	0.28099	3.2e-05
18JV-93-1-19	1057	40	0.014231	0.000103	0.000414	0.282179	2.8e-05
18JV-93-1-20	563	8	0.021761	0.000605	0.00056	0.281977	2.9e-05
18JV-93-1-21	1810	36	0.026285	0.00048	0.000672	0.281486	3.1e-05
18JV-93-1-22	255	4	0.03912	0.001099	0.001089	0.282691	3.3e-05
18JV-93-1-23	451	7	0.023428	8e-05	0.000675	0.282747	3e-05
18JV-93-1-24	1853	35	0.016688	5.3e-05	0.000449	0.281559	2.5e-05
18JV-93-1-25	1570	37	0.055444	0.001145	0.001429	0.281644	3e-05
18JV-93-1-27	180	3	0.124537	0.000682	0.003167	0.282863	3.6e-05
18JV-93-1-28	968	12	0.032456	0.000625	0.000775	0.281964	2.5e-05
18JV-93-1-29	1863	40	0.012748	4.9e-05	0.00037	0.281559	3.2e-05

## Sheet: North Borneo REZAL
REZAL unpublished data from Northern Borneo (Recycled Borneo zircon + West Sundaland contribution)
sample	point	age	uncert	hfhf	hfhfse	luhf
18SB21	18SB21-14	2555	16	0.28116	1.2e-05	0.000601645
18SB21	18SB21-27	2445	16	0.281334	1.9e-05	0.000673784
18SB21	18SB21-16	1710	18	0.281539	1.8e-05	0.000465545
18SB21	18SB21-61	1868	18	0.281545	1.5e-05	0.000405
18SB21	18SB21-33	1860	18	0.281554	1.3e-05	0.000265807
18SB21	18SB21-34	1839	18	0.281569	1.5e-05	0.000222128
18SB21	18SB21-04	1866	17	0.281638	1.9e-05	0.00101213
18SB21	18SB21-59	1765	18	0.281719	1.4e-05	0.00133653
18SB21	18SB21-47	1168	21	0.281846	1.3e-05	0.000338427
18SB21	18SB21-52	930	18	0.28193	1.6e-05	0.000402985
18SB21	18SB21-28	759	16	0.28193	2.9e-05	0.00045286
18SB21	18SB21-40	1555	18	0.281987	1.6e-05	0.00167545
18SB21	18SB21-37	549	11	0.281998	1.4e-05	0.000121203
18SB21	18SB21-10	938	19	0.282005	1.1e-05	0.00026308
18SB21	18SB21-42	1207	23	0.28203	1.4e-05	0.000580504
18SB21	18SB21-35	1487	19	0.282047	1.3e-05	0.00125492
18SB21	18SB21-95	997	19	0.282066	1.8e-05	0.00172923
18SB21	18SB21-05	403	8	0.282139	1.6e-05	3.34861e-05
18SB21	18SB21-75	631	13	0.282196	1.3e-05	0.000662952
18SB21	18SB21-38	219	4	0.282236	1.1e-05	0.00112949
18SB21	18SB21-48	212	4	0.282291	2.2e-05	0.00111265
18SB21	18SB21-94	802	15	0.282327	4.3e-05	0.00163416
18SB21	18SB21-22	431	9	0.282421	1.2e-05	0.0029744
18SB21	18SB21-83	187	4	0.282427	3.5e-05	0.00262634
18SB21	18SB21-26	247	5	0.282435	1.6e-05	0.000188742
18SB21	18SB21-32	249	5	0.282442	1.1e-05	0.000634491
18SB21	18SB21-80	239	5	0.282477	3.1e-05	0.00137381
18SB21	18SB21-17	157	3	0.282489	3.4e-05	0.00265801
18SB21	18SB21-68	123	3	0.282511	1.5e-05	0.00054582
18SB21	18SB21-88	148	3	0.282528	1.7e-05	0.00133582
18SB21	18SB21-55	135	3	0.282565	1.1e-05	0.000757482
18SB21	18SB21-66	220	5	0.282588	1.5e-05	0.000661712
18SB21	18SB21-29	334	7	0.282615	1.6e-05	0.00168626
18SB21	18SB21-09	208	4	0.282626	1.3e-05	0.00104651
18SB21	18SB21-01	342	7	0.282665	1.2e-05	0.00149882
18SB21	18SB21-20	114	3	0.282734	1.1e-05	0.00093066
18SB21	18SB21-49	92	2	0.282781	1.7e-05	0.000782404
18SB21	18SB21-72	452	9	0.282795	2.4e-05	0.00151122
18SB21	18SB21-58	207	4	0.282799	1.9e-05	0.00187065
18SB21	18SB21-50	114	3	0.282801	1.4e-05	0.00109621
18SB21	18SB21-44	117	2	0.282806	1.3e-05	0.000735023
18SB21	18SB21-11	311	6	0.282809	1.1e-05	0.000930639
18SB21	18SB21-90	124	3	0.282859	1.4e-05	0.000917248
18SB21	18SB21-62	159	3	0.282861	1.4e-05	0.00141386
18SB21	18SB21-63	108	2	0.282873	1.8e-05	0.00132258
18SB21	18SB21-70	98	2	0.282918	3.2e-05	0.000810714
18SB21	18SB21-02	108	2	0.282918	1.1e-05	0.00214184
18SB21	18SB21-07	108	2	0.282924	1.1e-05	0.000532348
18SB21	18SB21-23	110	3	0.282943	1.3e-05	0.000527755
18SB21	18SB21-91	72	2	0.28297	3.4e-05	0.00325376
18SB21	18SB21-53	96	2	0.282995	1.2e-05	0.000660445
18SB21	18SB21-99	77	2	0.283022	2.8e-05	0.000995118
18SB21	18SB21-64	164	4	0.283035	1.2e-05	0.000992008
18SB21	18SB21-54	91	2	0.283039	1e-05	0.00102697
18SB21	18SB21-12	109	3	0.283075	1.4e-05	0.000923377
18SB21	18SB21-65	102	2	0.283121	1.4e-05	0.00220616
